# Supplementary material for: Psychometric properties of the Chinese version of Five Facet Mindfulness Questionnaire—short form in cancer patients: a Bayesian structural equation modeling approach
Source: Springer Nature journal article supplement (doi:10.1186/s12955-021-01692-1), 2021-02-10

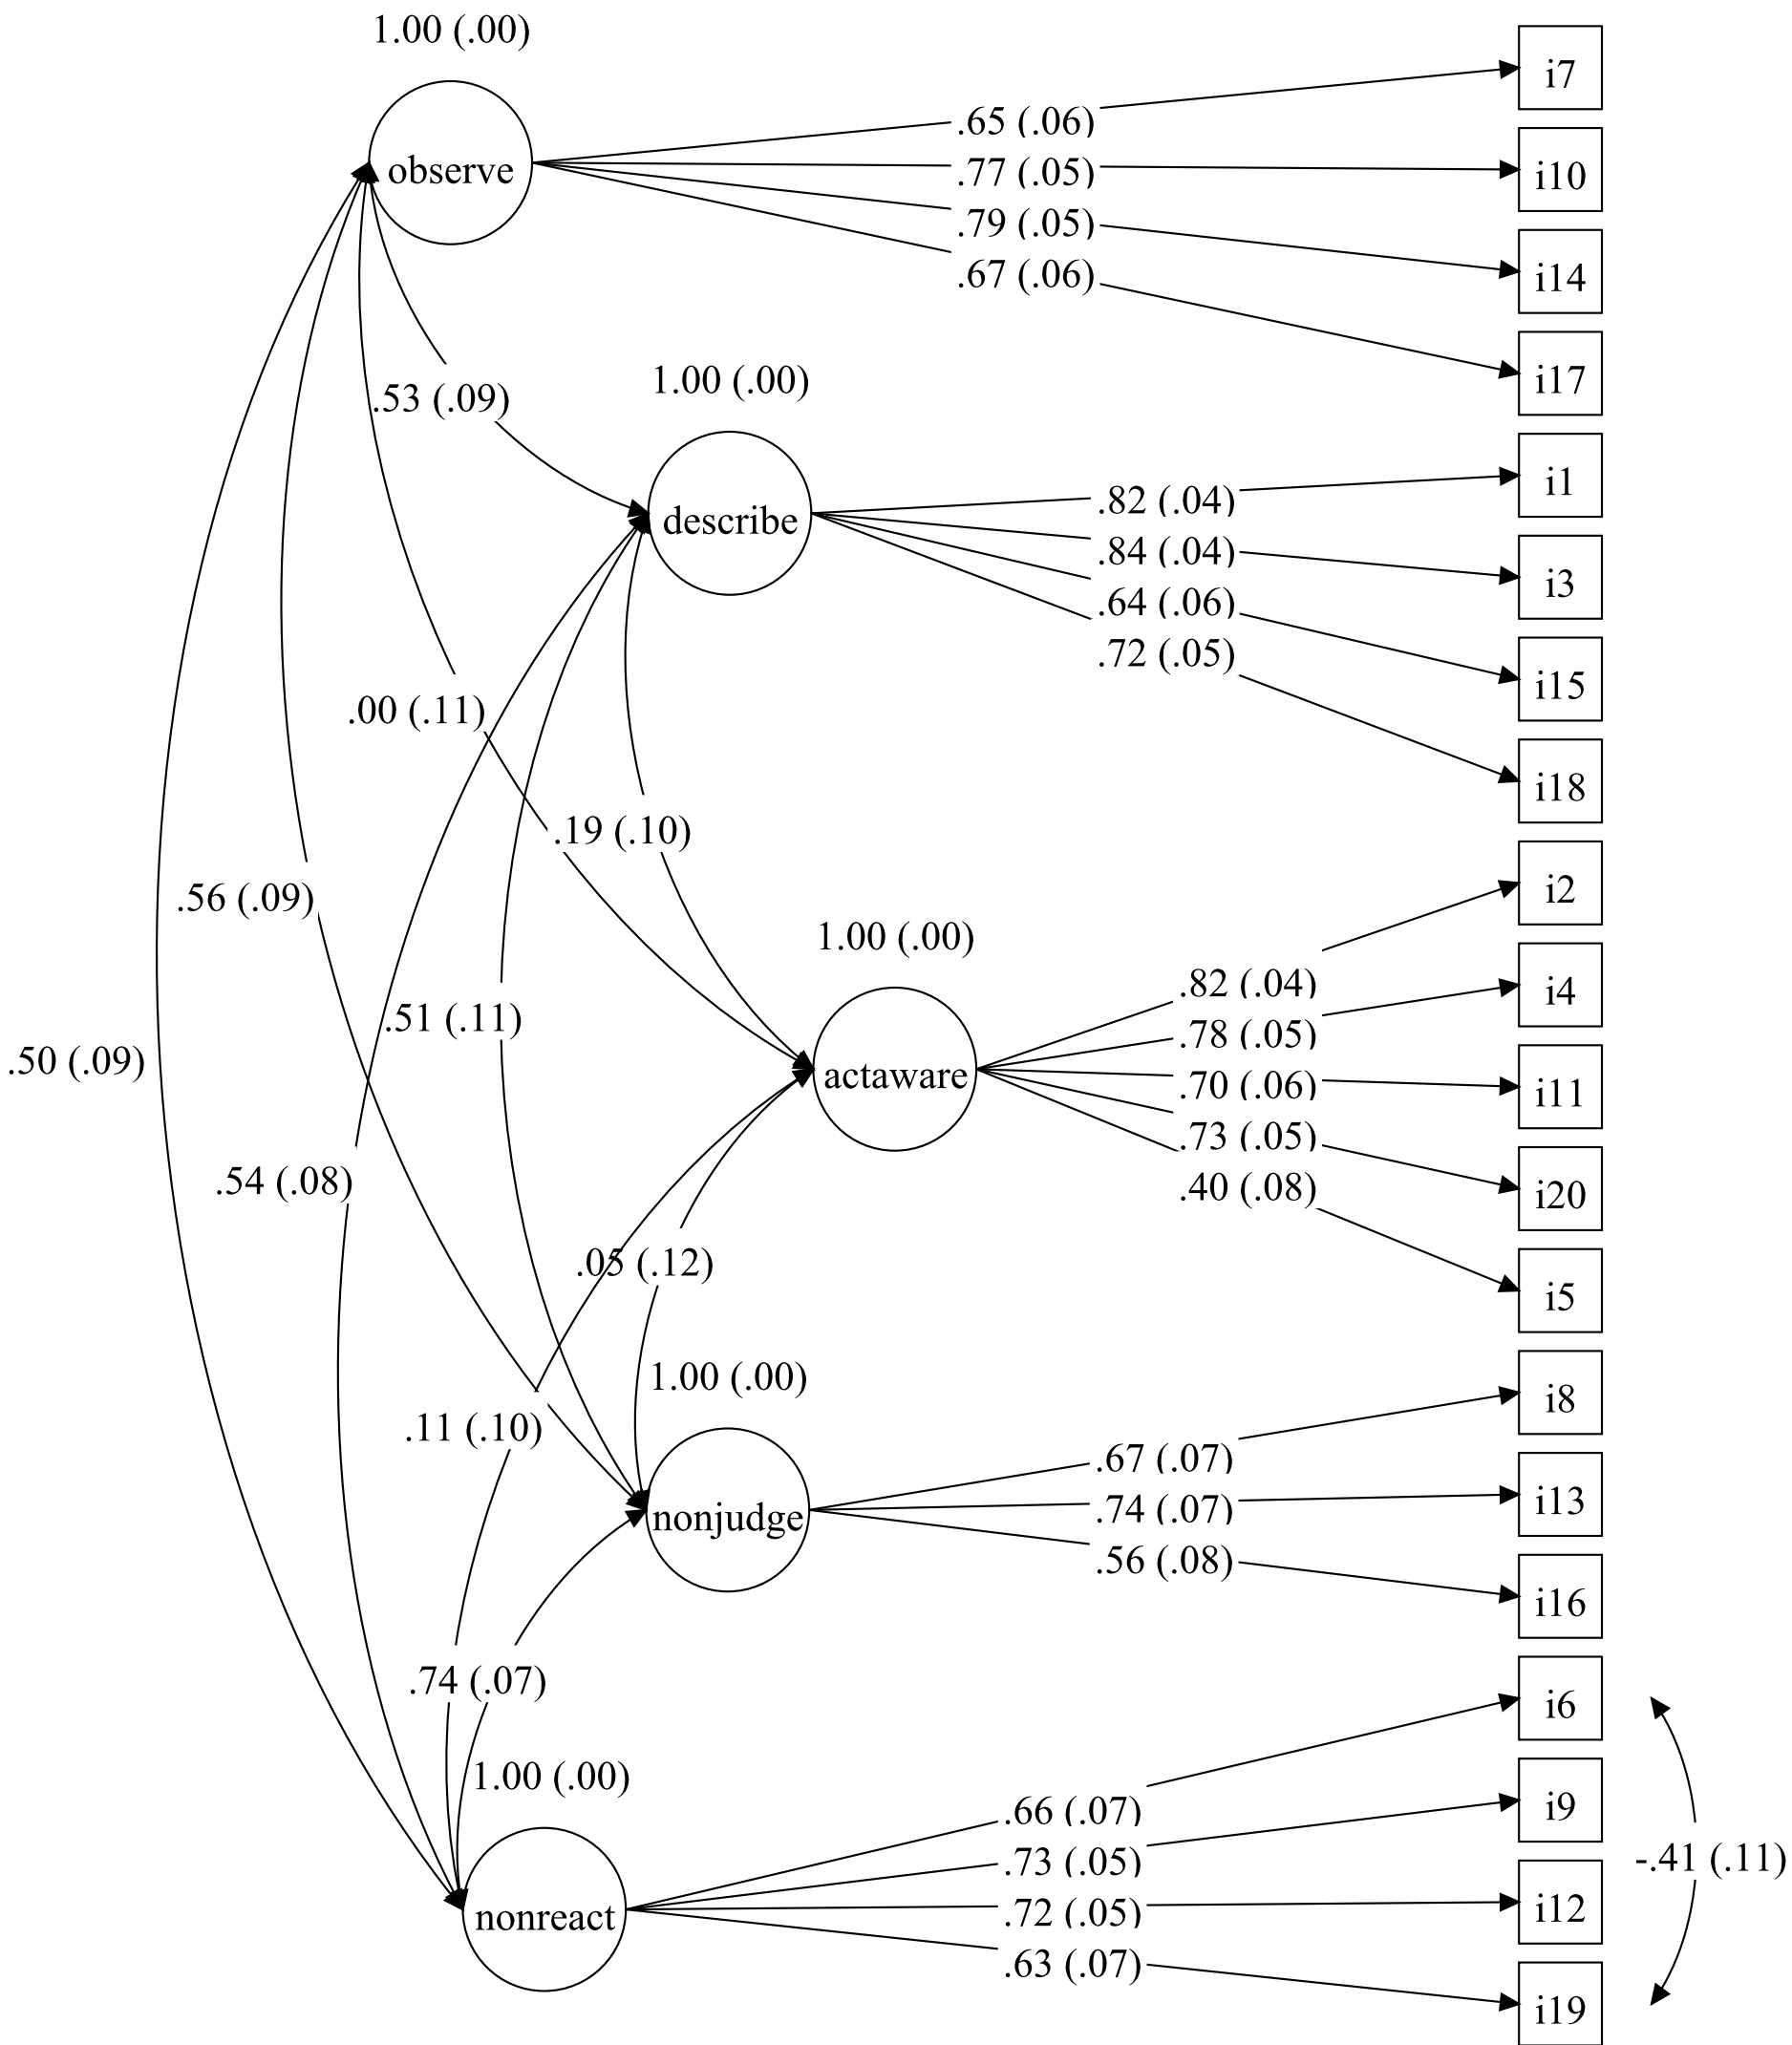

Supplement: MOESM3 [file 18852582]
